# Supplementary material
Source: Research Square preprint supplement (doi:10.21203/rs.3.rs-9660231/v1)
Supplement: Supplementary file 1 [file 9b33803e38202c779f08d382.docx]

**Supplementary information**


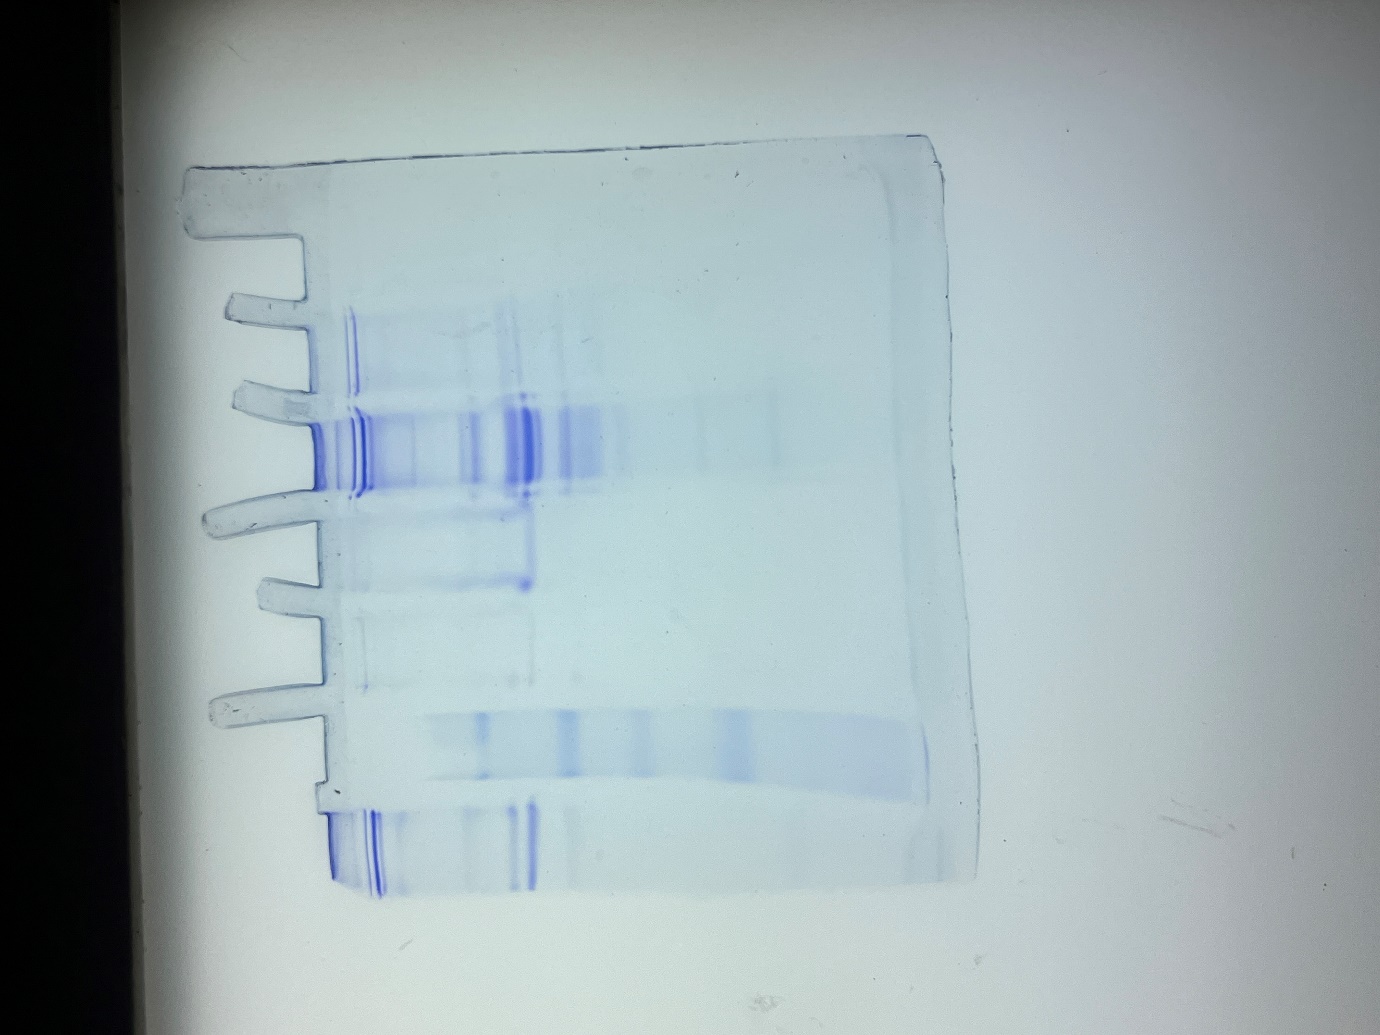


**Supplementary Fig. 1 Supplementary Fig. 1.** Uncropped PAGE gel image showing Lane 2 (molecular weight marker); Lane 3 (purified amylase, DEAE-cellulose fraction, 5 µg load); Lane 4 (purified amylase, DEAE-cellulose fraction, 20 µg load) displaying a distinct band at ~62 kDa; Lane 5 (size-exclusion fraction of the enzyme); Lanes 1 and 6 (other protein fractions); and Lane 7 (empty).


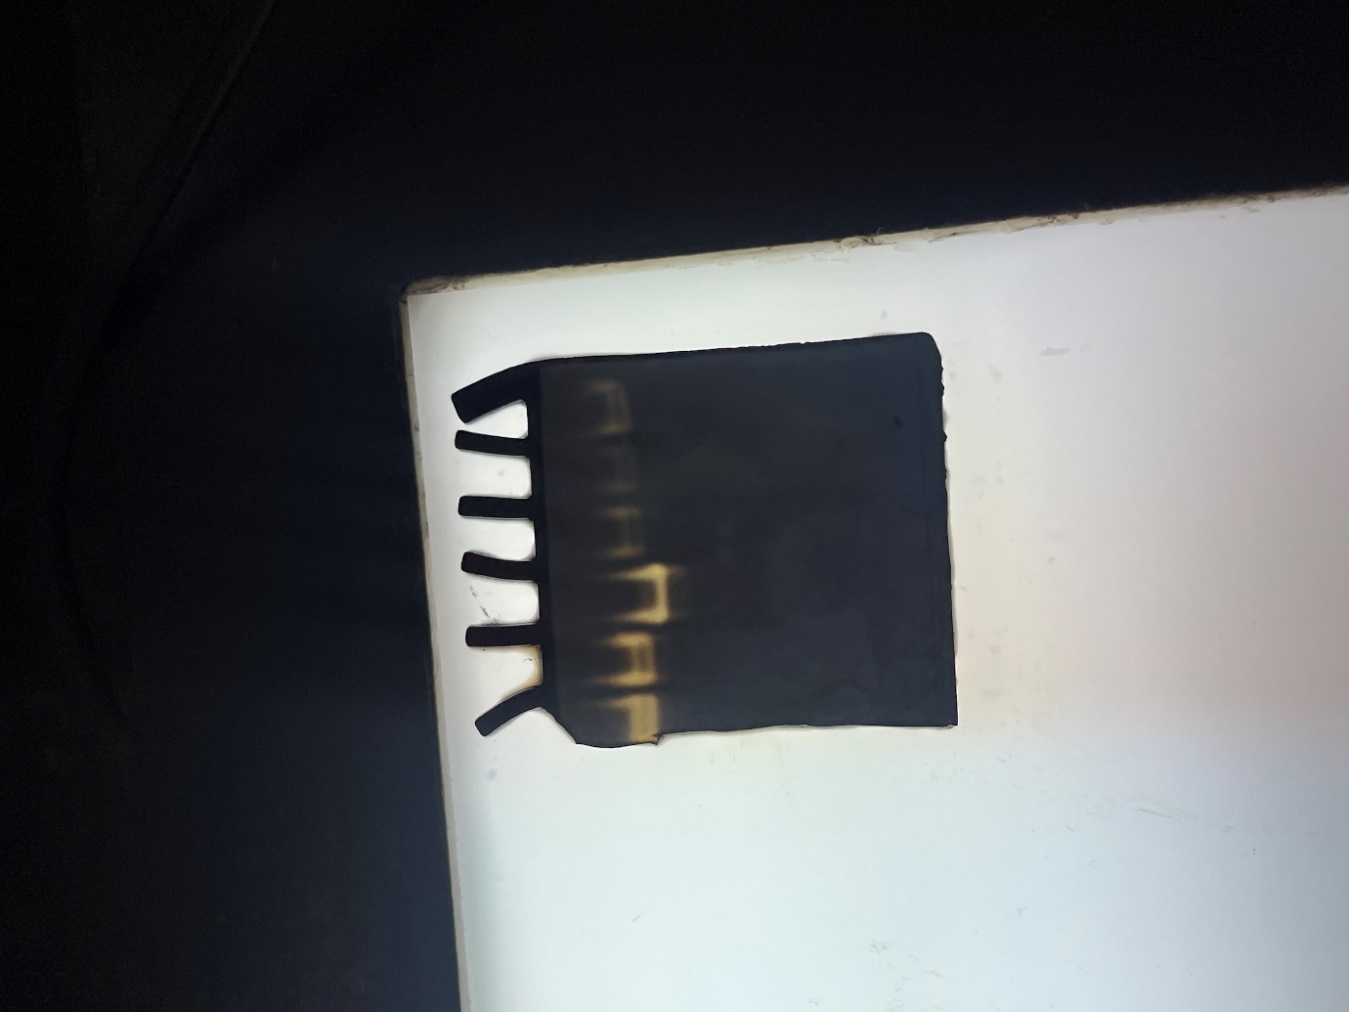


**Supplementary Fig. 2.** Uncropped zymogram gel image showing a clear activity band in Lane 3 (purified amylase from *Laceyella sacchari*); Lanes 1, 2, 4, 5, and 6 represent other bacterialamylase**.**


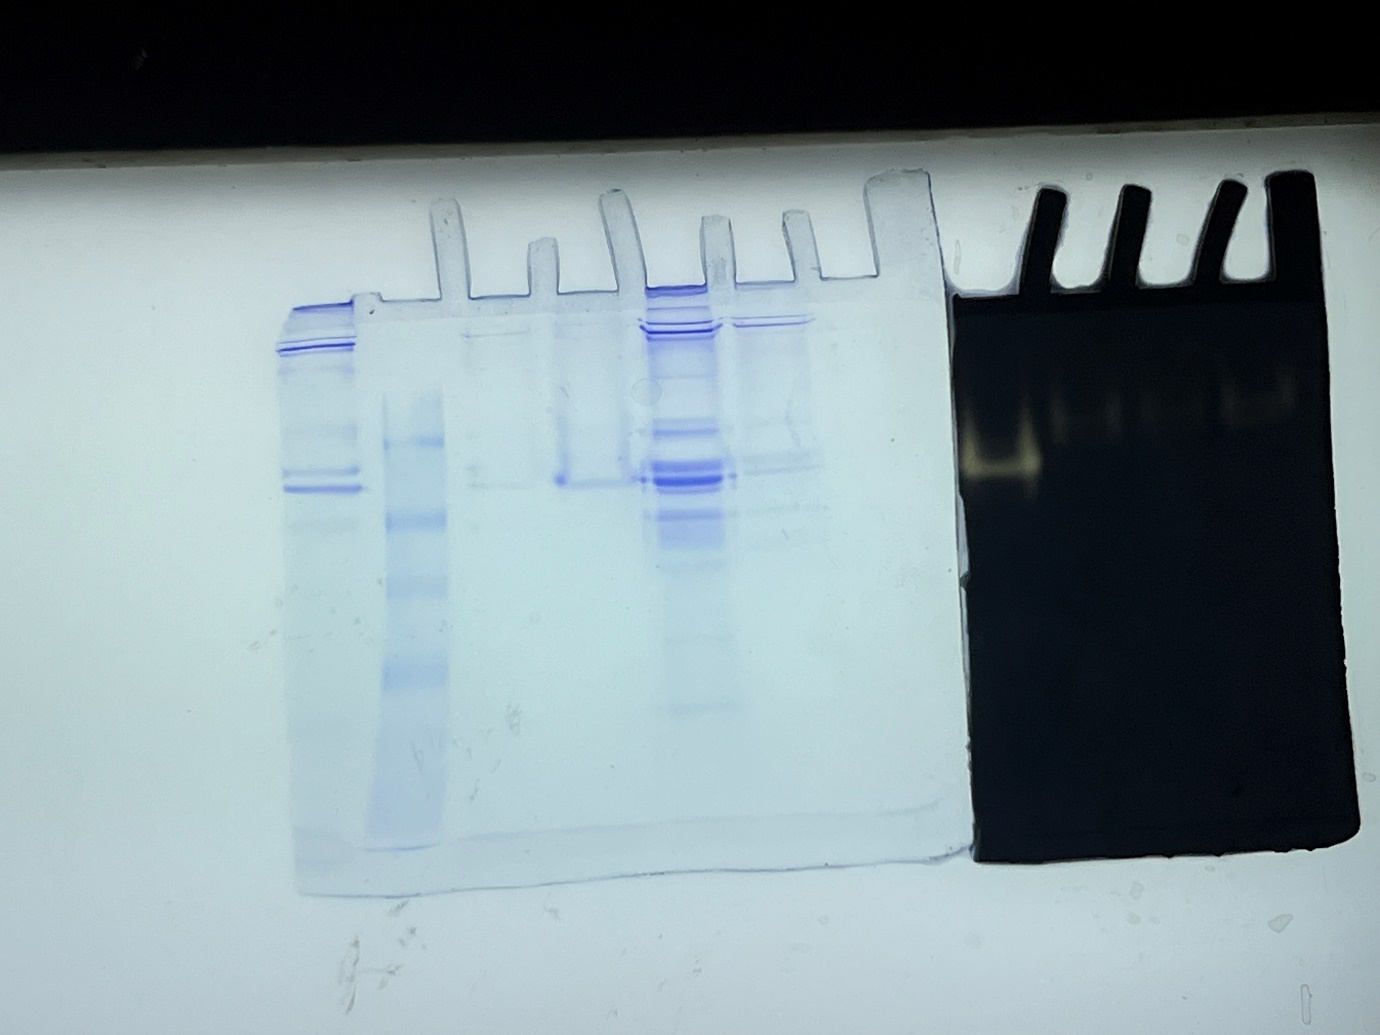


**Supplementary Fig. 3** Uncropped gel image showing comparison of PAGE gel with zymography gel

**Supplementary Table 1** Proximate analysis of wheat flour

| Parameter | Obtained value (%) |
| --- | --- |
| Ash | 3.76 |
| Fat | 2.19 |
| Protein | 10.83 |
| Crude fibre | 5.10 |
| Carbohydrate | 78.12 |
